# Supplementary material for: Nano-Selenium Alleviates Cd-Induced Chronic Colitis through Intestinal Flora
Source: MDPI journal article supplement (doi:10.3390/nu16091330), 2024-04-28
Supplement: s1 [file s1]

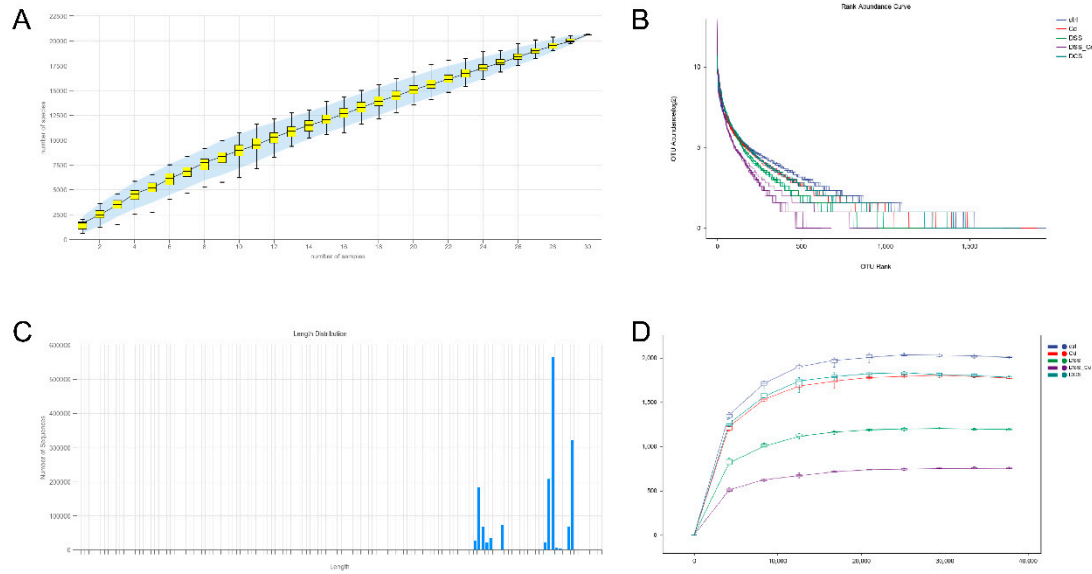

Figure S1 species accumulation curve, abundance grade curve, sequence length distribution, and rarefaction curves analysis. A, species accumulation curve; B, abundance grade curve; C, sequence length distribution; D, rarefaction curves

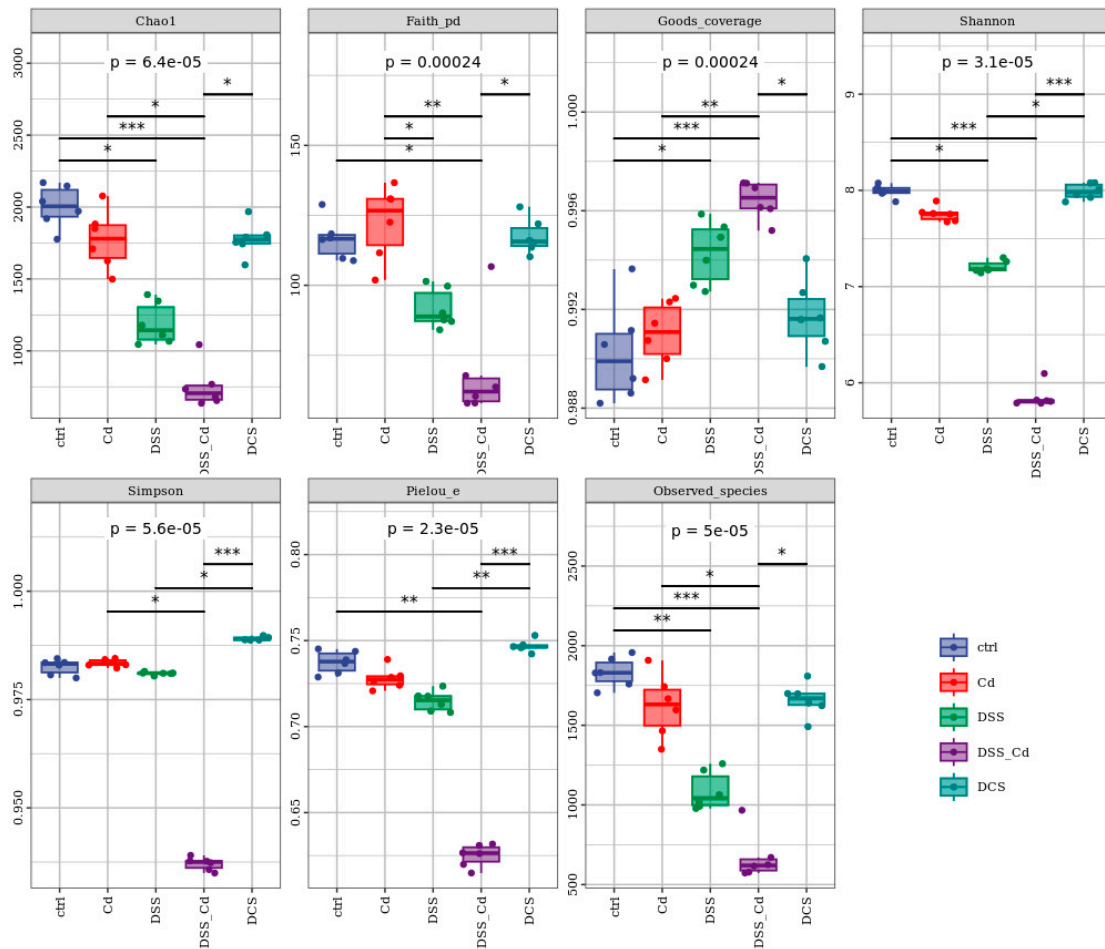

Figure S2 Alpha diversity index analysis

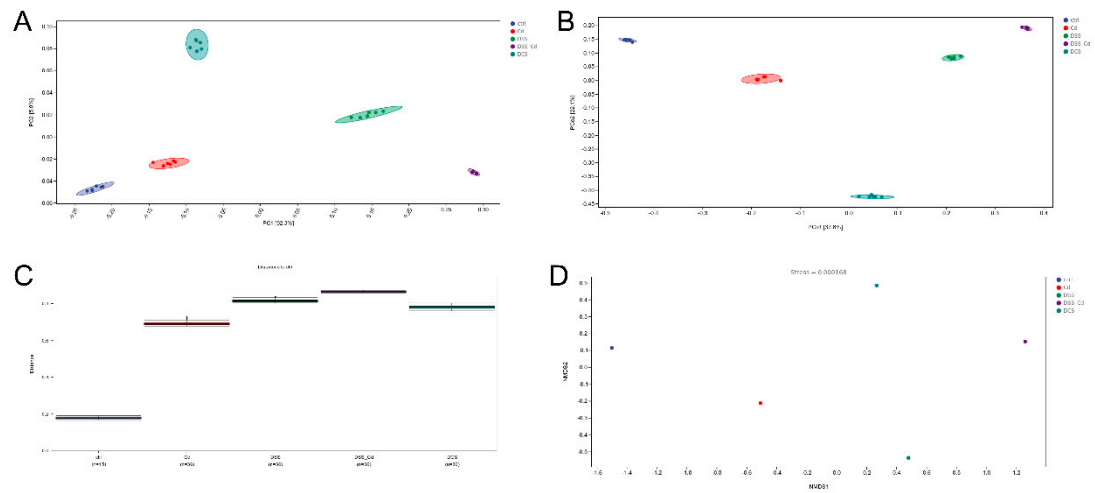

Figure S3 PCA analysis and Beta diversity analysis. A, PCA analysis; B, PCoA analysis; C, NMDS analysis; D, Analysis of differences between groups

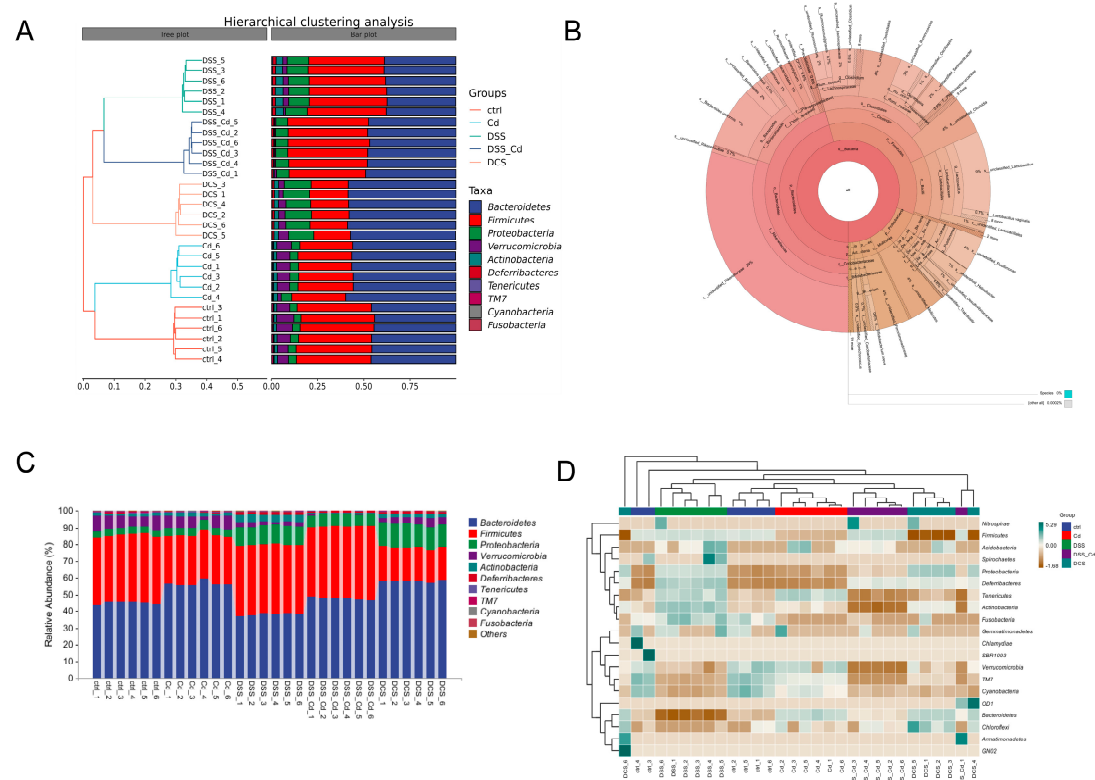

Figure S4: Analysis of dominant species based on relative abundance phylum level. A, hierarchical cluster analysis; B, Krona species composition analysis; C, relative abundance information of species at phylum level; D, species composition heat map
